# Supplementary material for: Influence of gender in monocrotaline and chronic hypoxia induced pulmonary hypertension in obese rats and mice
Source: Springer Nature journal article supplement (doi:10.1186/s12931-020-01394-0), 2020-06-03
Supplement: MOESM1 [file 18046812]

**Influence of gender in monocrotaline and chronic hypoxia induced pulmonary hypertension in obese rats and mice**

Balram Neupane; Akylbek Sydykov; Kabita Pradhan; Christina Vroom; Christiane Herden; Srikanth Karnati; Hossein Ardeschir Ghofrani; Sergey Avdeev; Süleyman Ergün; Ralph Theo Schermuly; Djuro Kosanovic

**ONLINE SUPPLEMENT MATERIAL**

## Results

**Supplementary figure 1.** Effects of obesity on echocardiographic parameters and pulmonary vascular remodeling in chronic hypoxia (HOX)-induced pulmonary hypertension (PH) in male B6 mice.

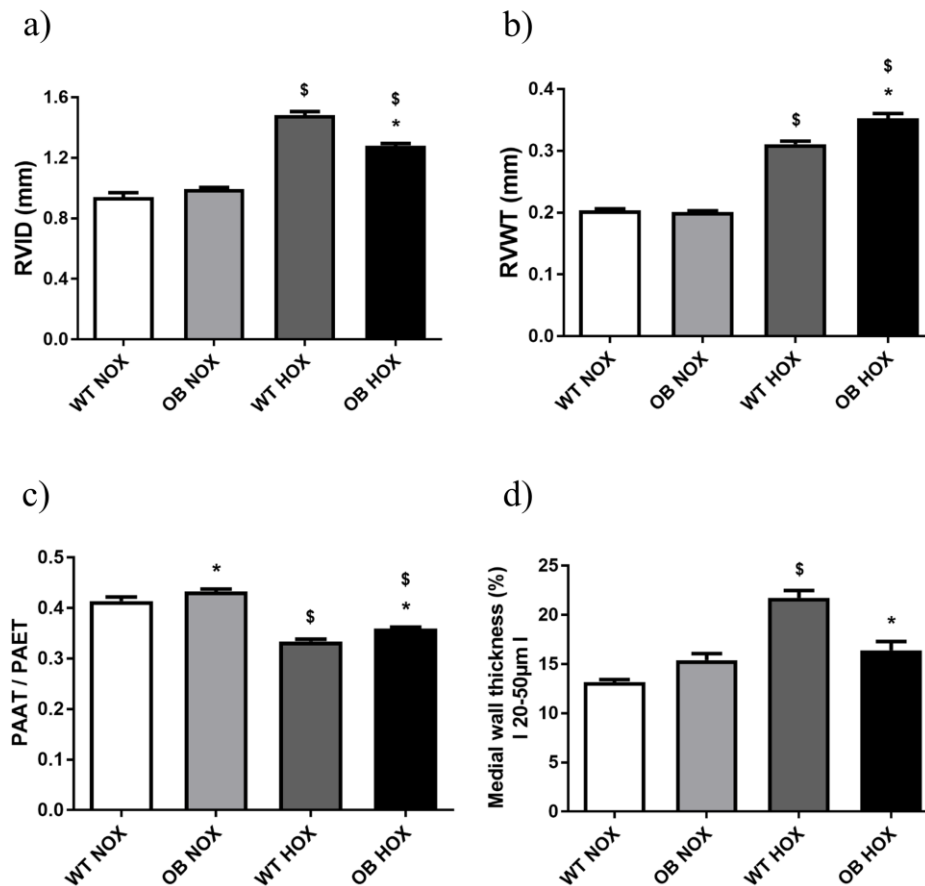

Echocardiography and medial wall thickness measurements were performed after 5 weeks of either normoxic (NOX) (WT NOX (n=5-10); OB NOX (n=5-20)) or hypoxic (HOX) (WT HOX (n=5-10); OB HOX (n=5-20)) exposure in wild type (WT) lean and obese (OB) male B6 mice. (a-c) Different echocardiographic parameters are given.

RVID = right ventricular internal diameter, RVWT = right ventricular wall thickness,

PAAT = pulmonary artery acceleration time, PAET = pulmonary artery ejection time. (d) Medial wall thickness is shown. Data are presented as mean  $\pm$  SEM (n=5-20).  $p < 0.05$  values are considered statistically significant. \*compared to wild type, §compared to normoxia.

**Supplementary figure 2.** Effects of obesity on echocardiographic parameters and pulmonary vascular remodeling in chronic hypoxia (HOX)-induced pulmonary hypertension (PH) in female B6 mice.

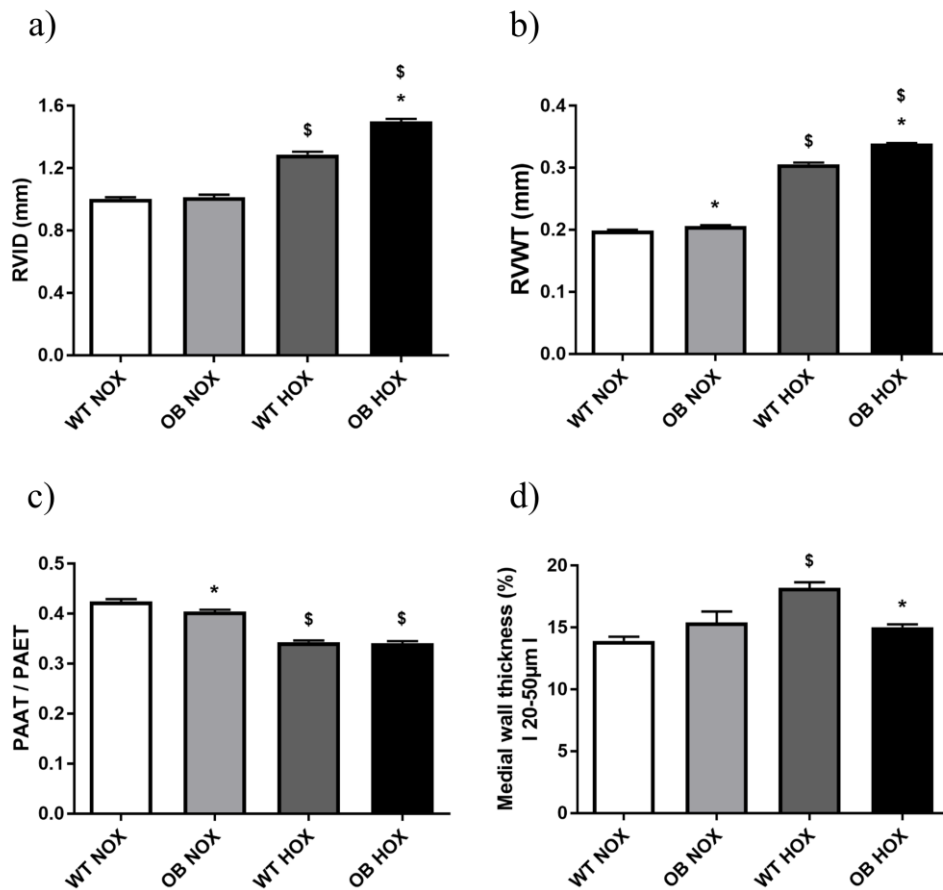

Echocardiography and medial wall thickness measurements were performed after 5 weeks of either normoxic (NOX) (WT NOX (n=5-10); OB NOX (n=5-10)) or hypoxic (HOX) (WT HOX (n=5-10); OB HOX (n=5-9)) exposure in wild type (WT) lean and obese (OB) female B6 mice. **(a-c)** Different echocardiographic parameters are given. RVID = right ventricular internal diameter, RVWT = right ventricular wall thickness, PAAT = pulmonary artery acceleration time, PAET = pulmonary artery ejection time. **(d)** Medial wall thickness is shown. Data are presented as mean  $\pm$  SEM (n=5-10).  $p < 0.05$  values are considered statistically significant. \*compared to wild type,  $\text{\$}$ compared to normoxia.
